# Supplementary material
Source: ML conference proceedings conference paper supplement (https://openaccess.thecvf.com/content/WACV2024/html/Demir_How_Do_Deepfakes_WACV_2024_paper.html)
Supplement: Supplementary file 1 [file Demir_How_Do_Deepfakes_WACV_2024_supplemental.pdf]

# How Do Deepfakes Move?

## Motion Magnification for Deepfake Source Detection

### Supplemental Material

İlke Demir  
Intel Labs  
Santa Clara, CA

ilke.demir@intel.com

Umur Aybars Çiftçi  
Binghamton University  
Binghamton, NY

uciftci@binghamton.edu

#### A. Network Architecture

In Table 1 we document our C3D [3] based network architecture. Our input with  $\omega = 16$  contains 16 consecutive frames and 4 channels for the dual representation.

| Layer  | BN3D | Act. | MaxPool3D | Output       |
|--------|------|------|-----------|--------------|
| Input  | -    | -    | -         | 112x112x4x16 |
| Conv3D | Yes  | Relu | Yes       | 56x56x64x16  |
| Conv3D | Yes  | Relu | Yes       | 28x28x128x8  |
| Conv3D | Yes  | Relu | No        | 28x28x256x8  |
| Conv3D | Yes  | Relu | Yes       | 14x14x256x4  |
| Conv3D | Yes  | Relu | No        | 14x14x512x4  |
| Conv3D | Yes  | Relu | Yes       | 7x7x512x2    |
| Conv3D | Yes  | Relu | No        | 7x7x512x2    |
| Conv3D | Yes  | Relu | Yes       | 4x4x512x1    |
| Flat   | No   | No   | No        | 8192         |
| Linear | No   | Relu | No        | 4096         |
| Linear | No   | Relu | No        | 4096         |
| Linear | No   | No   | No        | 2            |

Table 1. **Network Architecture.** Layer details and sizes are documented for the source detection network.

#### B. Source Detection vs. Deepfake Detection vs. Real Class Accuracy

We emphasize that, although these are related tasks, their construction is different. Source detection classifies videos into real or *several* fake classes, computing accuracy among all of these classes, including the accuracy on the real class. Deepfake detection classifies videos into real and fake classes as a binary choice, independent of the number of generators contributed to each fake class, computing accuracy by correctly classified videos over all videos, which can be the mean of real and fake class accuracies in case the dataset is balanced. Source detection is a harder task

in terms of categorizing the data into different classes and deepfake detection is a harder task in case different generators create significantly different samples with varying realism. In Table 2, we list and compare these accuracies for FF [2] and FAVC [1] datasets. (These results are listed throughout the main text but not in this format).

| Accuracy      | Level  | FF    | FAVC  |
|---------------|--------|-------|-------|
| Source Det.   | Sample | 95.92 | 89.67 |
| Source Det.   | Video  | 97.77 | 94.03 |
| Real Class    | Sample | 89.17 | 90.71 |
| Real Class    | Video  | 91.00 | 91.43 |
| Deepfake Det. | Sample | 92.37 | 95.10 |
| Deepfake Det. | Video  | 94.80 | 95.12 |

Table 2. **Source vs. Deepfake Detection.** Sample/video accuracies for different detection tasks are compiled on FF and FAVC.

#### References

- [1] Hasam Khalid, Shahroz Tariq, Minha Kim, and Simon S. Woo. Fakeavceleb: A novel audio-video multimodal deepfake dataset. *arXiv preprint arXiv:2108.05080*, 2021. 1
- [2] Andreas Rossler, Davide Cozzolino, Luisa Verdoliva, Christian Riess, Justus Thies, and Matthias Niessner. Faceforensics++: Learning to detect manipulated facial images. In *The IEEE International Conference on Computer Vision (ICCV)*, October 2019. 1
- [3] Du Tran, Lubomir Bourdev, Rob Fergus, Lorenzo Torresani, and Manohar Paluri. Learning spatiotemporal features with 3d convolutional networks. In *2015 IEEE International Conference on Computer Vision (ICCV)*, pages 4489–4497, 2015. 1
